# Supplementary material for: Baseline Levels of Vitamin D in a Healthy Population from a Region with High Solar Irradiation
Source: MDPI journal article supplement (doi:10.3390/nu13051647), 2021-05-13
Supplement: s1 [file s1]

# Baseline Levels of Vitamin D in a Healthy Population from a Region with High Solar Irradiation

Alicia García-Dorta <sup>1</sup>, Lillian Medina-Vega <sup>2</sup>, Jacobo Javier Villacampa-Jiménez <sup>2</sup>, Marta Hernández-Díaz <sup>1</sup>, Sagrario Bustabad-Reyes <sup>1</sup>, Enrique González-Dávila <sup>3</sup> and Federico Díaz-González <sup>1,4,\*</sup>

## Supplementary Materials:

**Table S1.** Distribution of the study population by place of residence, gender, and age.

|                             | Rural     |         | Urban     |           | Total      |           |            |
|-----------------------------|-----------|---------|-----------|-----------|------------|-----------|------------|
| Age (years)                 | Male      | Female  | Male      | Female    | Male       | Female    | Total      |
| 20-44                       | 41 (4%)   | 37 (4%) | 235 (25%) | 224 (23%) | 276 (29%)  | 262 (27%) | 537 (57%)  |
| 45-64                       | 22 (2%)   | 20 (2%) | 113 (12%) | 112 (12%) | 135 (14%)  | 132 (14%) | 266 (28%)  |
| ≥65                         | 13 (1%)   | 15 (1%) | 51 (5%)   | 66 (7%)   | 64 (7%)    | 82 (8%)   | 146 (15%)  |
| Subtotal                    | 76 (8%)   | 73 (8%) | 399 (42%) | 402 (42%) | 474 (50%)  | 475 (50%) | 949 (100%) |
| Total                       | 148 (16%) |         | 801 (84%) |           | 949 (100%) |           |            |
| Data are expressed as n (%) |           |         |           |           |            |           |            |

**Table S2.** Means ( $\mu$ ) and standard deviations ( $\sigma$ ) of log-transformed VitD levels.

| Sex                  |          | Age (years)                  |         |         |
|----------------------|----------|------------------------------|---------|---------|
|                      |          | 20 – 44                      | 45 - 64 | ≥ 65    |
| Male                 | $\mu$    | 3.3611– 0.01615·(BMI–25.89)* | 3.2538  | 3.2254  |
|                      | $\sigma$ | 0.31875                      | 0.34421 | 0.30959 |
| Female               | $\mu$    | 3.2654 –0.01698·(BMI–24.92)* | 3.1392  | 2.9873  |
|                      | $\sigma$ | 0.38482                      | 0.35410 | 0.34756 |
| BMI: Body Mass Index |          |                              |         |         |

**Table S3.** Difference between percentiles obtained from sample data and those obtained by applying the condition of normality on the log transformation.

|                 | Male (age, years) |        |        | Female (age, years) |        |        | Sex    |        | Age group |        |        | Total  |
|-----------------|-------------------|--------|--------|---------------------|--------|--------|--------|--------|-----------|--------|--------|--------|
|                 | 20-44             | 45-64  | ≥ 65   | 20-44               | 45-64  | ≥ 65   | Male   | Female | 20-44     | 45-64  | ≥ 65   | Total  |
| P <sub>10</sub> | 0.18              | -0.55  | 0.45   | -0.71               | 0.36   | -0.20  | 0.13   | -0.28  | -0.25     | -0.19  | -0.09  | -0.33  |
| P <sub>20</sub> | -0.12             | -0.25  | 1.19   | -0.66               | -0.45  | 0.10   | -0.08  | -0.25  | -0.50     | -0.21  | -0.07  | -0.17  |
| P <sub>30</sub> | 0.30              | -0.14  | -0.55  | -0.54               | -0.38  | -0.84  | 0.01   | -0.47  | -0.67     | -0.45  | 0.10   | -0.39  |
| P <sub>40</sub> | 0.79              | 0.41   | -1.13  | -0.34               | -0.44  | -0.43  | 0.23   | -0.52  | -0.06     | -0.30  | -0.12  | -0.38  |
| P <sub>50</sub> | 0.35              | 0.21   | -0.89  | -0.61               | -1.14  | 0.16   | 0.07   | -0.55  | 0.10      | -0.40  | -0.58  | -0.31  |
| P <sub>60</sub> | 0.35              | 0.25   | -0.71  | 0.08                | -0.95  | 0.29   | -0.25  | -0.15  | -0.02     | -0.10  | -0.64  | -0.02  |
| P <sub>70</sub> | 0.15              | -0.90  | -0.85  | 0.40                | -0.24  | 0.05   | 0.00   | 0.44   | 0.43      | -0.45  | -0.95  | -0.10  |
| P <sub>80</sub> | -0.68             | 0.85   | 0.10   | 0.65                | -0.75  | -0.70  | -0.05  | 0.79   | -0.12     | 0.10   | -0.61  | 0.72   |
| P <sub>90</sub> | 0.51              | -1.23  | 0.98   | -0.88               | 2.13   | -0.97  | 0.66   | 0.37   | 0.35      | 1.71   | 1.06   | 0.67   |
| p               | 0.18              | 0.51   | 0.60   | 0.15                | 0.54   | 0.11   | 0.36   | 0.68   | 0.52      | 0.90   | 0.31   | 0.82   |
| r <sub>s</sub>  | 0.9986            | 0.9964 | 0.9914 | 0.9982              | 0.9909 | 0.9974 | 0.9995 | 0.9991 | 0.9995    | 0.9976 | 0.9961 | 0.9996 |

p: p-value comparing whether differences between the percentiles differ from zero; r<sub>s</sub> = Spearman rho.

Cells are shaded green for differences in absolute values between sample and log-transformed data < 0.5; yellow for differences between 0.5 and 1, and red for differences > 1 in absolute values.
